# Supplementary material for: Water induced zinc oxide thin film formation and its transistor performance
Source: Royal Society of Chemistry journal article supplement (doi:10.1039/c3tc32311k), 2014-01-01
Supplement: c3tc32311k1.pdf [file c3tc32311k1.pdf]

Supporting Information for

## Water Induced Zinc Oxide Thin Film Formation and its Transistor Performance

Jingjing Chang,<sup>a</sup> Kok Leong Chang,<sup>b</sup> Chunyan Chi,<sup>a</sup> Jie Zhang,<sup>b,\*</sup> Jishan Wu<sup>a,b,\*</sup>

1. XRD studies on ZnO powder.

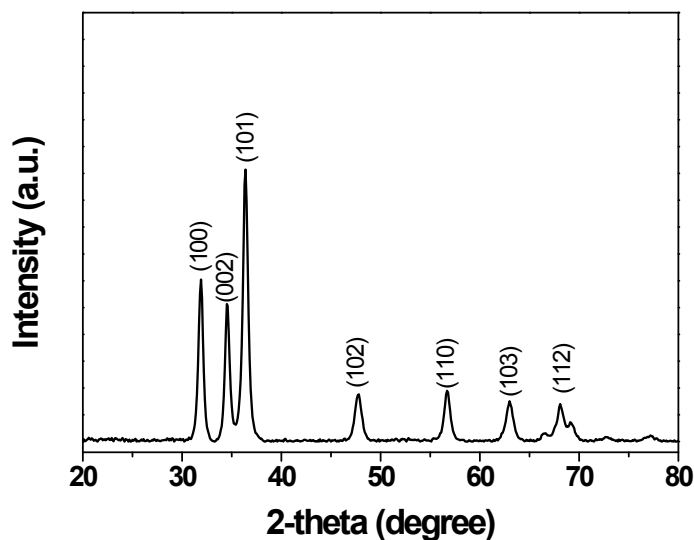

**Fig.S1** X-ray diffraction pattern of the ZnO nanoparticle powder after annealing at 250 °C.

2. ZnO TFT transfer curve – the ZnO film annealed at 350 °C

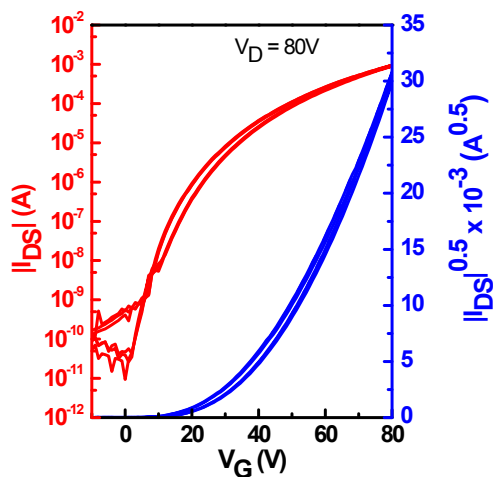

**Fig. S2** Transfer characteristics of TFTs based on ZnO films annealed at 350°C and repeat for 3 times.

- In the case of water vapor assisted annealing, the polar water molecule absorbed on the ZnO surface, the oxygen dangling bonds on ZnO could accept electrons which cause electrons to accumulate at the surface. The bands are bent such that the surface electron density (surface conductivity) increases.<sup>S1</sup>

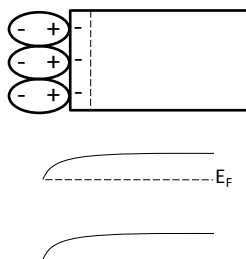

**Fig. S3** Illustration of polar water molecule and ZnO interaction and ZnO band bending as results of water assisted annealing

#### 4. ZnO TFT hysteresis

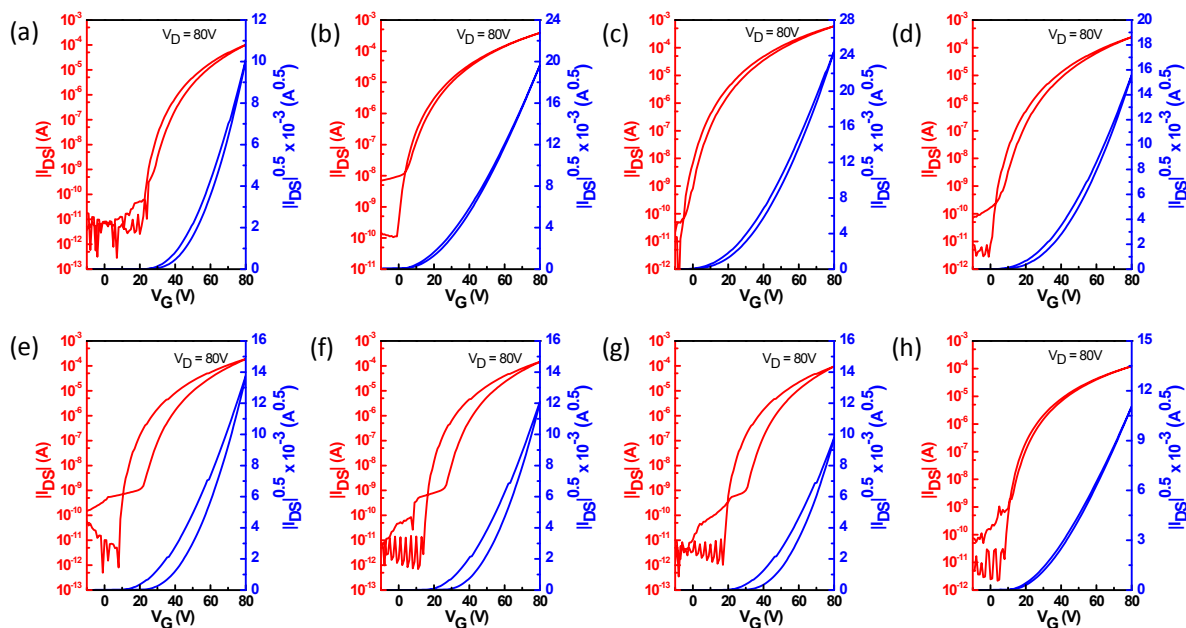

**Fig.S4** The hysteresis voltage ( $V_h$ ) from the typical transfer characteristics of the ZnO devices based on different conditions (dry annealing, water vapor annealing, and water volume ratio of 2%, 5%, 10%, 30% and 50%) (a-g). (h) The TFT device of (e) test in  $N_2$  conditions.

5. Transfer characteristics of ZnO after one week in air

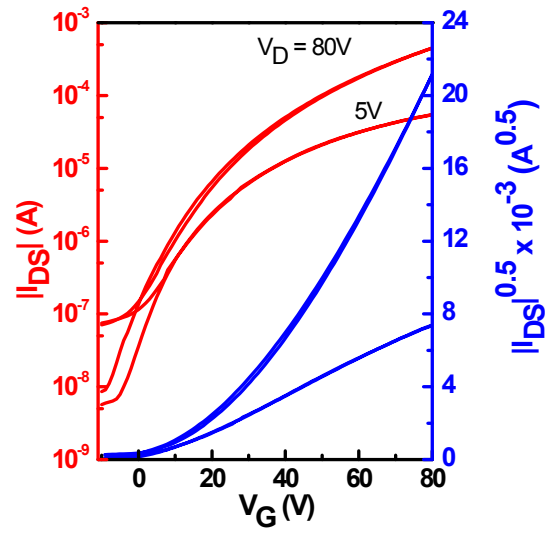

**Fig. S5** Transfer characteristics of TFTs based on ZnO films after stored in air for one week.

Reference

S1. J.F. Boyle and K.A. Jones, Journal of Electronic Materials, 1977,**6(6)**, 717
